# Supplementary material for: DNA Content in Embryonic Extracellular Vesicles Is Independent of the Apoptotic Rate in Bovine Embryos Produced In Vitro
Source: MDPI journal article supplement (doi:10.3390/ani14071041), 2024-03-29

DNA content in embryonic extracellular vesicles is independent of the apoptotic rate in bovine embryos produced in vitro  
Diego Caamaño 1, Joel Cabezas 1, Constanza Aguilera 1, Ioanna Martinez 1, Yat Sen Wong 1, Daniela Sanhueza1, Belén Ibañez1, Sebastián Rodríguez1, Fidel Ovidio Castro 1 and Lleretny Rodríguez-Alvarez 1,\*

| ALIX (90-100 kDa) |            | Ponceau    | ALIX/Ponceau |  | 95 kDa |
|-------------------|------------|------------|--------------|------------------------------------------------------------------------------------|--------|
| 1                 | 29,104,454 | 62,165,721 | 0.468175283  |                                                                                    |        |
| 2                 | 13,584,751 | 56,131,132 | 0.242018119  |                                                                                    |        |

| CD9 (22-27 kDa) |            | Ponceau    | CD9/Ponceau |  | 22-27 kDa |
|-----------------|------------|------------|-------------|------------------------------------------------------------------------------------|-----------|
| 1               | 38,194,295 | 62,165,721 | 0.614394788 |                                                                                    |           |
| 2               | 32,866,546 | 56,131,132 | 0.585531501 |                                                                                    |           |

| TSG (50 kDa) |            | Ponceau    | TSG/Ponceau | 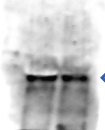 | 50 kDa |
|--------------|------------|------------|-------------|------------------------------------------------------------------------------------|--------|
| 1            | 33,753,408 | 63,110,902 | 0.534826899 |                                                                                    |        |
| 2            | 35,432,236 | 57,935,831 | 0.611577247 |                                                                                    |        |

| APOA (28 kDa) |           | Ponceau    | APOA/Ponceau | 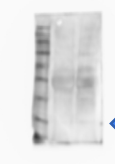 | 25 kDa |
|---------------|-----------|------------|--------------|-------------------------------------------------------------------------------------|--------|
| 1             | 2,442,345 | 61,306,085 | 0.039838541  |                                                                                     |        |
| 2             | 3,361,957 | 56,590,073 | 0.059408953  |                                                                                     |        |

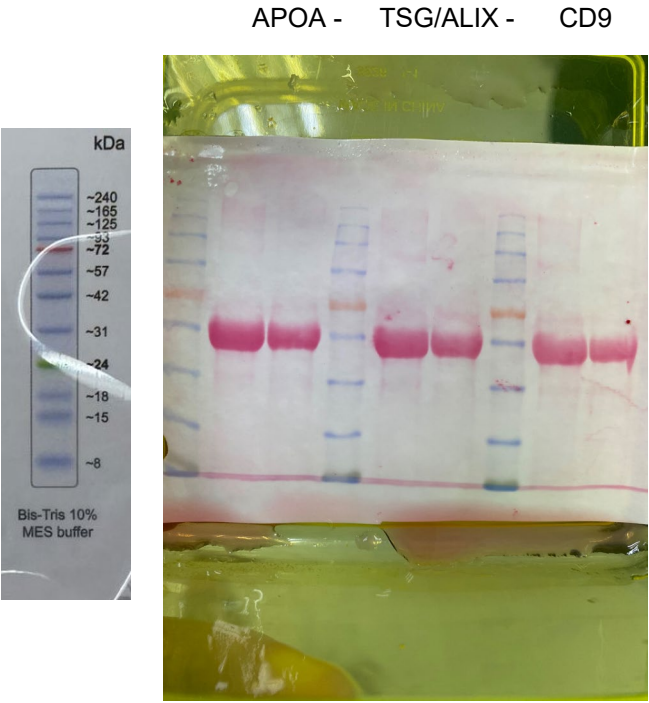

Supplement: s1 [file s1]
